# Supplementary material
Source: PubMed Central journal article supplement (PMC6092740)
Supplement: NIHMS546806-supplement-2.pdf [file NIHMS546806-supplement-2.pdf]

**eAppendix. Generic names and formulation of drugs included in each class of preventive medication**

| CLASS                        | GENERIC NAME                              | FORMULATION |
|------------------------------|-------------------------------------------|-------------|
| Blood Pressure Regulating Rx | aliskiren/valsartan                       | tablet      |
|                              | amlodipine besylate                       | tablet      |
|                              | amlodipine besylate/benazepril hcl        | capsule     |
|                              | amlodipine besylate/olmesartan medoxomil  | tablet      |
|                              | amlodipine besylate/valsartan             | tablet      |
|                              | atenolol/chlorthalidone                   | tablet      |
|                              | benazepril hcl                            | tablet      |
|                              | benazepril hcl/hctz                       | tablet      |
|                              | benazepril hcl/hydrochlorothiazide        | tablet      |
|                              | bepidil hcl                               | tablet      |
|                              | bisoprolol fumarate/hydrochlorothiazide   | tablet      |
|                              | candesartan cilexetil                     | tablet      |
|                              | candesartan cilexetil/hydrochlorothiazide | tablet      |
|                              | captopril                                 | tablet      |
|                              | captopril/hydrochlorothiazide             | tablet      |
|                              | diltiazem hcl                             | cap.sr 12h  |
|                              | diltiazem hcl                             | cap.sr 24h  |
|                              | diltiazem hcl                             | capsule cr  |
|                              | diltiazem hcl                             | capsule sa  |
|                              | diltiazem hcl                             | tab.sr 24h  |
|                              | diltiazem hcl                             | tablet      |
|                              | diltiazem malate                          | tab.sr 24h  |
|                              | enalapril maleate                         | tablet      |
|                              | enalapril maleate/diltiaz mal             | tab.sr 24h  |
|                              | enalapril maleate/felodipine              | tablet sa   |
|                              | enalapril maleate/hydrochlorothiazide     | tablet      |
|                              | eprosartan mesylate                       | tablet      |
|                              | eprosartan mesylate/hydrochlorothiazide   | tablet      |
|                              | felodipine                                | tab.sr 24h  |

|                                         |            |
|-----------------------------------------|------------|
| fosinopril sodium                       | tablet     |
| fosinopril sodium/hydrochlorothiazide   | tablet     |
| hctz/propranolol                        | tablet     |
| irbesartan                              | tablet     |
| irbesartan/hydrochlorothiazide          | tablet     |
| isradipine                              | capsule    |
| isradipine                              | tab er 24  |
| isradipine                              | tab osm 24 |
| isradipine                              | tab sr osm |
| labetalol hcl/hctz                      | tablet     |
| lisinopril                              | tablet     |
| lisinopril/hydrochlorothiazide          | tablet     |
| losartan potassium                      | tablet     |
| losartan potassium/hydrochlorothiazide  | tablet     |
| methyclothiazide/pargyline              | tablet     |
| metoprolol tartrate/hydrochlorothiazide | tablet     |
| metyrosine                              | capsule    |
| mibefradil di-hcl                       | tablet     |
| moexipril hcl                           | tablet     |
| moexipril hcl/hydrochlorothiazide       | tablet     |
| nadolol/bendroflumethiazide             | tablet     |
| nicardipine hcl                         | ampul      |
| nicardipine hcl                         | capsule    |
| nicardipine hcl                         | capsule sa |
| nifedipine                              | capsule    |
| nifedipine                              | tab er 24  |
| nifedipine                              | tab osm 24 |
| nifedipine                              | tab sa osm |
| nifedipine                              | tab sr osm |
| nifedipine                              | tablet sa  |
| nimodipine                              | capsule    |

|                                          |            |
|------------------------------------------|------------|
| nisoldipine                              | tab.sr 24h |
| olmesartan medoxomil                     | tablet     |
| olmesartan medoxomil/hydrochlorothiazide | tablet     |
| pargyline hcl                            | tablet     |
| pargyline hydrochloride                  | tablet     |
| perindopril erbumine                     | tablet     |
| propranolol hcl/hctz                     | tablet     |
| propranolol hcl/hydrochlorothiazide      | capsule sa |
| propranolol hcl/hydrochlorothiazide      | tablet     |
| quinapril hcl                            | tablet     |
| quinapril hcl/hydrochlorothiazide        | tablet     |
| ramipril                                 | capsule    |
| ramipril                                 | tablet     |
| saralasin acetate                        | ampul      |
| telmisartan                              | tablet     |
| telmisartan/amlodipine besylate          | tablet     |
| telmisartan/hydrochlorothiazide          | tablet     |
| timolol maleate/hctz                     | tablet     |
| timolol maleate/hydrochlorothiazide      | tablet     |
| trandolapril                             | tablet     |
| trandolapril/verapamil hcl               | tab mphase |
| trandolapril/verapamil hcl               | tbmp 24hr  |
| valsartan                                | capsule    |
| valsartan                                | tablet     |
| valsartan/hydrochlorothiazide            | tablet     |
| verapamil hcl                            | ampul      |
| verapamil hcl                            | cap24h pct |
| verapamil hcl                            | cap24h pel |
| verapamil hcl                            | tab er 24  |
| verapamil hcl                            | tab sr osm |
| verapamil hcl                            | tablet     |

Glaucoma Rx

|                                        |            |
|----------------------------------------|------------|
| verapamil hcl                          | tablet sa  |
| apraclonidine hcl                      | droperette |
| apraclonidine hcl                      | drops      |
| betaxolol hcl                          | drops      |
| betaxolol hcl                          | drops susp |
| bimatoprost                            | drops      |
| brimonidine tartrate                   | drops      |
| brimonidine tartrate/timolol maleate   | drops      |
| brinzolamide                           | drops susp |
| carbachol                              | drops      |
| carbachol/pilocarpine                  | drops      |
| carteolol hcl                          | drops      |
| demecarium bromide                     | drops      |
| dorzolamide hcl                        | drops      |
| dorzolamide hcl/timolol maleate        | drops      |
| echothiophate iodide                   | drops      |
| epinephrine                            | drops      |
| epinephryl borate                      | drops      |
| latanoprost                            | drops      |
| levobunolol hcl                        | drops      |
| metipranolol                           | drops      |
| physostigmine salicylate               | drops      |
| pilocarpine hcl                        | drops      |
| pilocarpine hcl/epi bit                | drops      |
| pilocarpine hcl/epinephrine            | drops      |
| pilocarpine hcl/epinephrine bitartrate | drops      |
| pilocarpine hcl/physostigmin           | drops      |
| pilocarpine nitrate                    | drops      |
| timolol                                | drops      |
| timolol maleate                        | drop daily |
| timolol maleate                        | droperette |

Glucose Regulating Rx

|                                     |            |
|-------------------------------------|------------|
| timolol maleate                     | drops      |
| timolol maleate/dorzolamide hcl     | drops      |
| timolol maleate/preservative free   | droperette |
| travoprost                          | drops      |
| travoprost (benzalkonium)           | drops      |
| unoprostone isopropyl               | drops      |
| acarbose                            | tablet     |
| acetoexamide                        | tablet     |
| chlorpropamide                      | tablet     |
| glimepiride                         | tablet     |
| glipizide                           | tab er 24  |
| glipizide                           | tab er2 24 |
| glipizide                           | tab osm 24 |
| glipizide                           | tablet     |
| glipizide/metformin hcl             | tablet     |
| glyburide                           | tablet     |
| glyburide, micronized/metformin hcl | tablet     |
| glyburide,micronized                | tablet     |
| glyburide/metformin hcl             | tablet     |
| metformin hcl                       | tab er 24  |
| metformin hcl                       | tab osm 24 |
| metformin hcl                       | tab.sr 24h |
| metformin hcl                       | tablet     |
| metformin hcl                       | tabsrgr24h |
| miglitol                            | tablet     |
| nateglinide                         | tablet     |
| pioglitazone hcl                    | tablet     |
| pioglitazone hcl/metformin hcl      | tablet     |
| pioglitazone hcl/metformin hcl      | tbmp 24hr  |
| pioglitazone/glimepiride            | tablet     |
| repaglinide                         | tablet     |

|                   |                                      |            |
|-------------------|--------------------------------------|------------|
|                   | repaglinide/metformin hcl            | tablet     |
|                   | rosiglitazone maleate                | tablet     |
|                   | rosiglitazone maleate/glimepiride    | tablet     |
|                   | rosiglitazone maleate/metformin hcl  | tablet     |
|                   | saxagliptin hydrochloride            | tablet     |
|                   | sitagliptin phosphate                | tablet     |
|                   | sitagliptin phosphate/metformin hcl  | tablet     |
|                   | tolazamide                           | tablet     |
|                   | tolbutamide                          | tablet     |
|                   | troglitazone                         | tablet     |
| Lipid Lowering Rx | atorvastatin calcium                 | tablet     |
|                   | ezetimibe/simvastatin                | tablet     |
|                   | fluvastatin sodium                   | capsule    |
|                   | fluvastatin sodium                   | tab.sr 24h |
|                   | lovastatin                           | tab.sr 24h |
|                   | lovastatin                           | tablet     |
|                   | niacin/lovastatin                    | tbmp 24hr  |
|                   | niacin/simvastatin                   | tbmp 24hr  |
|                   | pitavastatin calcium                 | tablet     |
|                   | pravastatin sodium                   | tablet     |
|                   | rosuvastatin calcium                 | tablet     |
|                   | simvastatin                          | tablet     |
| Osteoporosis Rx   | alendronate sodium                   | tablet     |
|                   | alendronate sodium/cholecalciferol   | tablet     |
|                   | etidronate disodium                  | ampul      |
|                   | etidronate disodium                  | tablet     |
|                   | ibandronate sodium                   | tablet     |
|                   | risedronate sodium                   | tablet     |
|                   | risedronate sodium/calcium carbonate | tab ds pk  |
|                   | tiludronate disodium                 | tablet     |

**eTable.**

**Case-crossover, time-crossover and case-case time-control estimates of the relationship between 5 classes of preventive medications and death where the estimates for the time-crossover are calculated only among cases with crossover in the exposure of interest.**

|                              | <b>Case-Crossover<br/>OR (95% CI)</b> | <b>Time-Control*<br/>OR (95% CI)</b> | <b>CCTC**<br/>OR (95% CI)</b> |
|------------------------------|---------------------------------------|--------------------------------------|-------------------------------|
| Lipid Lowering Rx            | 0.39 ( 0.37, 0.41)                    | 0.23 ( 0.20, 0.25)                   | 1.73 ( 1.58, 1.91)            |
| Blood Pressure Regulating Rx | 0.38 ( 0.37, 0.39)                    | 0.23 ( 0.21, 0.24)                   | 1.66 ( 1.56, 1.77)            |
| Glaucoma Rx                  | 0.40 ( 0.38, 0.42)                    | 0.27 ( 0.24, 0.31)                   | 1.44 ( 1.29, 1.66)            |
| Glucose Regulating Rx        | 0.39 ( 0.37, 0.40)                    | 0.22 ( 0.20, 0.24)                   | 1.76 ( 1.57, 1.93)            |
| Osteoporosis Rx              | 0.45 ( 0.42, 0.48)                    | 0.28 ( 0.24, 0.33)                   | 1.57 ( 1.36, 1.88)            |

\* Average of crossover in reference medications among cases with crossover in exposure of interest

\*\* CCTC = Case-case time-control
